# Supplementary material for: Burgos, Resumen del curso pasado: País musical
Source: Royal Society of Chemistry journal article supplement (doi:10.1039/c1an15679a), 1982-01-01
Supplement: c1an15679a.pdf [file c1an15679a.pdf]

# Supplementary Information:

## Using ratiometric indicator-displacement assays in semi-quantitatively colorimetric determination of chloride, bromide, and iodide anions

Zheng Shen, Hui Li, and Liang Feng\*

Laboratory of Instrumentation and Analytical Chemistry, Key Lab of Separation Science for Analytical Chemistry of CAS,  
Dalian Institute of Chemical Physics, CAS, Dalian, Liaoning 116023, P. R. China  
Email: ([fengl@dicp.ac.cn](mailto:fengl@dicp.ac.cn))

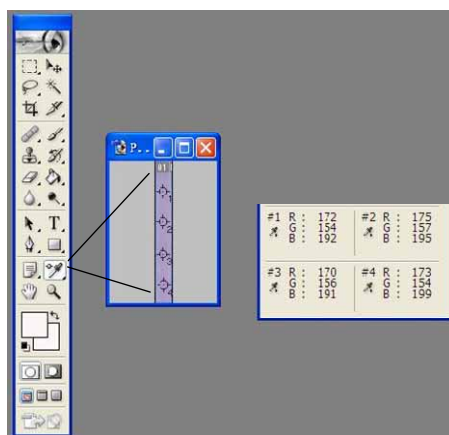

**Fig. S1** The colour sampler function in Adobe Photoshop software package was used to collect red, green and blue values of scanned supernatant liquid images.

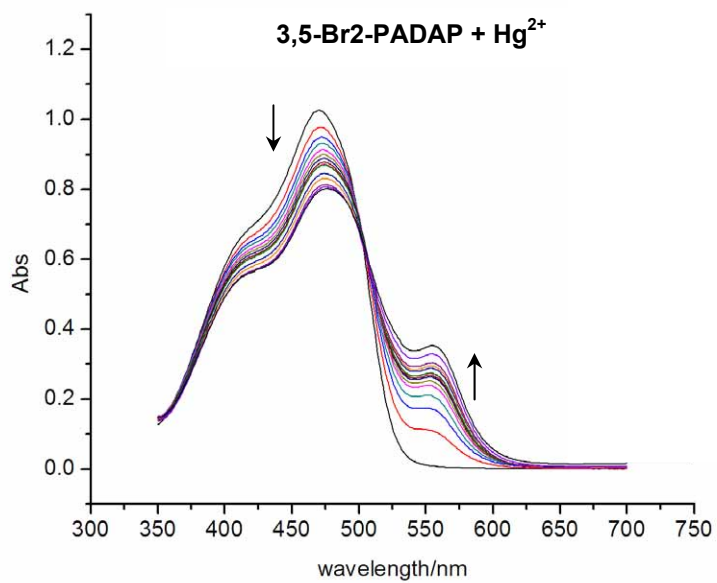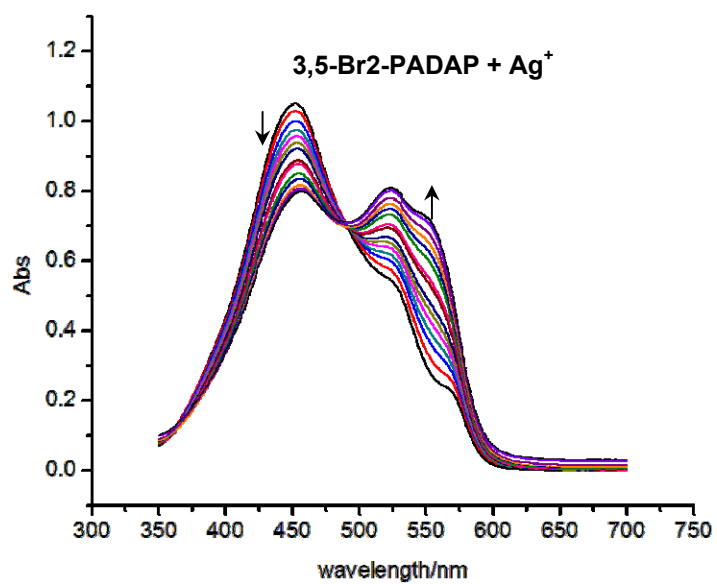

**Fig. S2** The titration curves of 3,5-Br<sub>2</sub>-PADAP and metal receptor Hg<sup>2+</sup> and Ag<sup>+</sup> cations. (The 3,5-Br<sub>2</sub>-PADAP concentration was  $2.5 \times 10^{-5}$  mol/L for both of the curves)

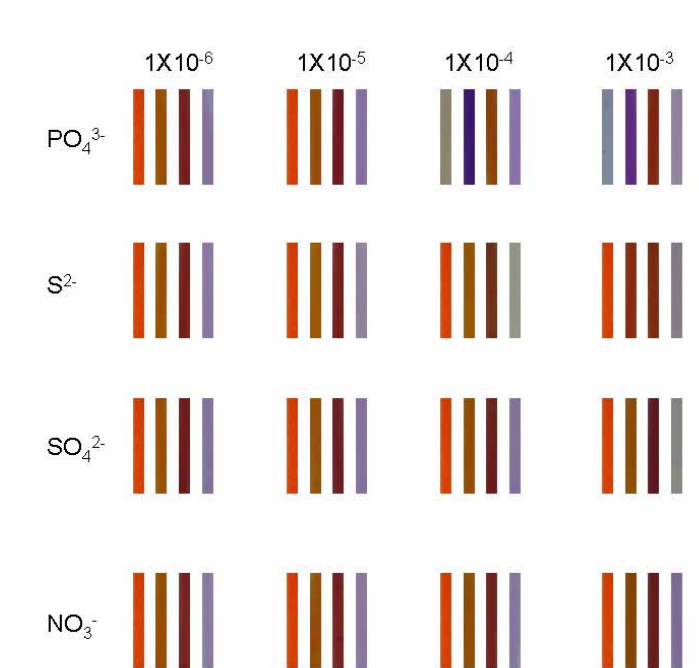

**Fig. S3** The RIDA responses to different interfering anions at various concentrations.

**Table S1.** The solubility product constants ( $K_{sp}$ ) of silver and mercuric cations with chloride, bromide, and iodide anions.

|                                 | <b>Ag</b>              | <b>Hg</b>          |
|---------------------------------|------------------------|--------------------|
| <b><math>\text{Cl}^-</math></b> | $1.923 \times 10^{-4}$ | 6.57               |
| <b><math>\text{Br}^-</math></b> | $1.328 \times 10^{-5}$ | 0.56               |
| <b><math>\text{I}^-</math></b>  | $3 \times 10^{-7}$     | $6 \times 10^{-3}$ |

**Table S2.** Full digital database (R=red, G=green, B=blue values) of RIDA array after reacting with chloride, bromide, and iodide.

|     |          | D-11-Ag  |     |    |           |     |     |   | D-11-Hg  |    |    |           |     |     |  |
|-----|----------|----------|-----|----|-----------|-----|-----|---|----------|----|----|-----------|-----|-----|--|
|     |          | 0.0001 M |     |    | 0.00001 M |     |     |   | 0.0001 M |    |    | 0.00001 M |     |     |  |
|     |          | R        | G   | B  | R         | G   | B   | R | G        | B  | R  | G         | B   |     |  |
| Cl- | 0        | Trial_1  | 213 | 64 | 8         | 215 | 103 | 1 | 157      | 40 | 5  | 195       | 140 | 192 |  |
|     |          | Trial_2  | 215 | 63 | 6         | 212 | 100 | 0 | 158      | 42 | 7  | 194       | 143 | 193 |  |
|     |          | Trial_3  | 215 | 61 | 5         | 214 | 99  | 1 | 160      | 39 | 8  | 192       | 142 | 190 |  |
|     |          | Trial_4  | 210 | 59 | 7         | 210 | 101 | 1 | 158      | 38 | 9  | 193       | 142 | 191 |  |
|     |          | Trial_5  | 207 | 59 | 6         | 213 | 101 | 0 | 165      | 36 | 10 | 195       | 140 | 193 |  |
|     | 1.00E-05 | Trial_1  | 208 | 47 | 0         | 216 | 106 | 0 | 149      | 38 | 8  | 192       | 141 | 190 |  |
|     |          | Trial_2  | 211 | 50 | 0         | 212 | 106 | 1 | 152      | 35 | 10 | 190       | 139 | 185 |  |
|     |          | Trial_3  | 203 | 43 | 1         | 212 | 107 | 1 | 150      | 40 | 10 | 185       | 137 | 186 |  |
|     |          | Trial_4  | 208 | 49 | 1         | 213 | 109 | 1 | 150      | 37 | 10 | 192       | 139 | 191 |  |
|     |          | Trial_5  | 211 | 47 | 0         | 215 | 109 | 1 | 150      | 39 | 10 | 188       | 138 | 186 |  |
|     | 5.00E-05 | Trial_1  | 210 | 57 | 1         | 213 | 114 | 0 | 146      | 39 | 9  | 189       | 149 | 188 |  |
|     |          | Trial_2  | 209 | 58 | 1         | 209 | 104 | 1 | 140      | 38 | 8  | 192       | 148 | 186 |  |
|     |          | Trial_3  | 210 | 57 | 1         | 209 | 106 | 1 | 140      | 36 | 10 | 189       | 145 | 185 |  |
|     |          | Trial_4  | 210 | 56 | 1         | 207 | 114 | 1 | 144      | 39 | 9  | 188       | 146 | 188 |  |
|     |          | Trial_5  | 210 | 58 | 1         | 210 | 111 | 1 | 142      | 38 | 9  | 189       | 144 | 183 |  |
|     | 1.00E-04 | Trial_1  | 208 | 62 | 1         | 213 | 111 | 1 | 155      | 33 | 9  | 199       | 155 | 189 |  |
|     |          | Trial_2  | 206 | 60 | 1         | 208 | 111 | 1 | 156      | 31 | 8  | 196       | 151 | 189 |  |
|     |          | Trial_3  | 206 | 62 | 1         | 206 | 103 | 1 | 151      | 28 | 10 | 190       | 148 | 183 |  |
|     |          | Trial_4  | 207 | 63 | 0         | 211 | 107 | 1 | 152      | 26 | 8  | 189       | 146 | 182 |  |
|     |          | Trial_5  | 208 | 65 | 0         | 205 | 111 | 1 | 153      | 28 | 9  | 190       | 149 | 183 |  |
|     | 5.00E-04 | Trial_1  | 209 | 80 | 1         | 213 | 111 | 0 | 171      | 46 | 5  | 203       | 163 | 174 |  |
|     |          | Trial_2  | 210 | 82 | 0         | 212 | 111 | 0 | 173      | 42 | 6  | 195       | 161 | 170 |  |
|     |          | Trial_3  | 211 | 83 | 1         | 216 | 111 | 1 | 164      | 40 | 6  | 204       | 163 | 173 |  |
|     |          | Trial_4  | 209 | 88 | 2         | 212 | 109 | 0 | 164      | 46 | 6  | 205       | 163 | 173 |  |
|     |          | Trial_5  | 209 | 89 | 2         | 210 | 109 | 1 | 168      | 49 | 6  | 197       | 160 | 171 |  |
|     | 1.00E-03 | Trial_1  | 215 | 83 | 1         | 211 | 110 | 1 | 165      | 44 | 8  | 195       | 171 | 171 |  |
|     |          | Trial_2  | 211 | 84 | 1         | 210 | 110 | 0 | 164      | 44 | 8  | 199       | 170 | 169 |  |
|     |          | Trial_3  | 215 | 85 | 0         | 212 | 111 | 1 | 166      | 42 | 10 | 200       | 163 | 166 |  |
|     |          | Trial_4  | 215 | 83 | 1         | 215 | 111 | 1 | 166      | 43 | 10 | 199       | 162 | 162 |  |
|     |          | Trial_5  | 211 | 82 | 1         | 214 | 112 | 1 | 169      | 40 | 8  | 199       | 164 | 163 |  |
|     | 5.00E-03 | Trial_1  | 216 | 93 | 1         | 215 | 115 | 2 | 178      | 52 | 6  | 200       | 174 | 154 |  |
|     |          | Trial_2  | 211 | 88 | 1         | 214 | 111 | 1 | 180      | 50 | 3  | 203       | 170 | 152 |  |
|     |          | Trial_3  | 210 | 82 | 0         | 211 | 111 | 1 | 179      | 43 | 4  | 203       | 173 | 153 |  |
|     |          | Trial_4  | 213 | 85 | 1         | 206 | 110 | 1 | 177      | 43 | 5  | 200       | 173 | 151 |  |
|     |          | Trial_5  | 214 | 88 | 1         | 214 | 112 | 1 | 180      | 45 | 4  | 201       | 170 | 153 |  |
|     | 1.00E-02 | Trial_1  | 213 | 95 | 0         | 214 | 112 | 2 | 174      | 50 | 4  | 208       | 181 | 151 |  |
|     |          | Trial_2  | 211 | 92 | 1         | 209 | 106 | 2 | 169      | 46 | 4  | 202       | 180 | 151 |  |
|     |          | Trial_3  | 214 | 91 | 1         | 210 | 111 | 1 | 172      | 51 | 5  | 202       | 176 | 150 |  |
|     |          | Trial_4  | 206 | 90 | 1         | 212 | 108 | 1 | 173      | 44 | 2  | 201       | 178 | 153 |  |
|     |          | Trial_5  | 209 | 89 | 1         | 216 | 109 | 2 | 170      | 48 | 4  | 204       | 180 | 151 |  |

|     |          | D-11-Ag  |     |     |           |     |     | D-11-Hg  |     |     |           |     |     |     |
|-----|----------|----------|-----|-----|-----------|-----|-----|----------|-----|-----|-----------|-----|-----|-----|
|     |          | 0.0001 M |     |     | 0.00001 M |     |     | 0.0001 M |     |     | 0.00001 M |     |     |     |
|     |          | R        | G   | B   | R         | G   | B   | R        | G   | B   | R         | G   | B   |     |
| Br- | 0        | Trial 1  | 213 | 64  | 8         | 206 | 98  | 1        | 157 | 65  | 34        | 167 | 153 | 189 |
|     |          | Trial 2  | 215 | 63  | 6         | 210 | 102 | 1        | 156 | 58  | 29        | 168 | 171 | 191 |
|     |          | Trial 3  | 215 | 61  | 5         | 211 | 97  | 0        | 157 | 58  | 29        | 169 | 154 | 190 |
|     |          | Trial 4  | 210 | 59  | 7         | 212 | 101 | 1        | 159 | 58  | 28        | 170 | 155 | 191 |
|     |          | Trial 5  | 207 | 59  | 6         | 216 | 100 | 0        | 162 | 62  | 30        | 172 | 168 | 195 |
|     | 1.00E-05 | Trial 1  | 204 | 60  | 11        | 191 | 103 | 2        | 163 | 68  | 34        | 177 | 165 | 197 |
|     |          | Trial 2  | 204 | 62  | 7         | 191 | 99  | 1        | 168 | 68  | 34        | 178 | 165 | 197 |
|     |          | Trial 3  | 200 | 66  | 10        | 193 | 103 | 2        | 166 | 66  | 32        | 180 | 165 | 198 |
|     |          | Trial 4  | 197 | 66  | 12        | 193 | 105 | 2        | 165 | 65  | 29        | 182 | 171 | 202 |
|     |          | Trial 5  | 197 | 65  | 12        | 197 | 99  | 1        | 168 | 66  | 31        | 182 | 174 | 203 |
|     | 5.00E-05 | Trial 1  | 203 | 75  | 8         | 180 | 108 | 4        | 167 | 75  | 32        | 176 | 160 | 181 |
|     |          | Trial 2  | 199 | 78  | 11        | 181 | 107 | 4        | 167 | 71  | 29        | 177 | 156 | 178 |
|     |          | Trial 3  | 196 | 74  | 8         | 182 | 108 | 5        | 166 | 65  | 27        | 179 | 155 | 178 |
|     |          | Trial 4  | 192 | 76  | 10        | 185 | 106 | 2        | 169 | 70  | 32        | 179 | 159 | 180 |
|     |          | Trial 5  | 190 | 76  | 11        | 188 | 107 | 3        | 168 | 70  | 30        | 181 | 162 | 183 |
|     | 1.00E-04 | Trial 1  | 205 | 77  | 4         | 204 | 111 | 1        | 167 | 75  | 30        | 176 | 161 | 165 |
|     |          | Trial 2  | 203 | 78  | 4         | 203 | 114 | 2        | 166 | 68  | 25        | 175 | 158 | 162 |
|     |          | Trial 3  | 197 | 78  | 6         | 204 | 107 | 0        | 168 | 74  | 30        | 176 | 156 | 159 |
|     |          | Trial 4  | 195 | 73  | 3         | 203 | 113 | 2        | 168 | 71  | 28        | 178 | 161 | 163 |
|     |          | Trial 5  | 193 | 71  | 3         | 201 | 113 | 2        | 168 | 66  | 26        | 178 | 163 | 164 |
|     | 5.00E-04 | Trial 1  | 206 | 108 | 2         | 193 | 113 | 4        | 190 | 85  | 8         | 187 | 168 | 167 |
|     |          | Trial 2  | 206 | 101 | 1         | 194 | 110 | 3        | 192 | 89  | 9         | 188 | 166 | 164 |
|     |          | Trial 3  | 205 | 101 | 2         | 194 | 111 | 4        | 191 | 85  | 8         | 188 | 170 | 163 |
|     |          | Trial 4  | 203 | 104 | 2         | 195 | 110 | 2        | 192 | 82  | 7         | 189 | 168 | 163 |
|     |          | Trial 5  | 204 | 108 | 2         | 197 | 113 | 3        | 191 | 82  | 8         | 189 | 170 | 161 |
|     | 1.00E-03 | Trial 1  | 207 | 105 | 0         | 190 | 106 | 2        | 196 | 87  | 13        | 182 | 167 | 159 |
|     |          | Trial 2  | 202 | 110 | 2         | 190 | 110 | 5        | 188 | 87  | 13        | 187 | 169 | 160 |
|     |          | Trial 3  | 201 | 112 | 6         | 192 | 111 | 5        | 192 | 83  | 11        | 186 | 165 | 154 |
|     |          | Trial 4  | 199 | 111 | 4         | 195 | 109 | 2        | 194 | 84  | 11        | 185 | 166 | 155 |
|     |          | Trial 5  | 198 | 108 | 3         | 196 | 107 | 1        | 194 | 73  | 12        | 186 | 168 | 157 |
|     | 5.00E-03 | Trial 1  | 207 | 107 | 1         | 194 | 107 | 2        | 185 | 95  | 7         | 176 | 166 | 157 |
|     |          | Trial 2  | 208 | 108 | 2         | 193 | 112 | 4        | 187 | 94  | 8         | 177 | 166 | 158 |
|     |          | Trial 3  | 202 | 104 | 0         | 195 | 105 | 1        | 189 | 96  | 8         | 180 | 166 | 155 |
|     |          | Trial 4  | 201 | 104 | 1         | 196 | 109 | 0        | 192 | 99  | 7         | 180 | 167 | 161 |
|     |          | Trial 5  | 200 | 103 | 2         | 198 | 108 | 0        | 193 | 98  | 7         | 181 | 170 | 159 |
|     | 1.00E-02 | Trial 1  | 217 | 114 | 1         | 200 | 108 | 1        | 200 | 105 | 6         | 185 | 167 | 158 |
|     |          | Trial 2  | 211 | 105 | 0         | 200 | 113 | 1        | 199 | 102 | 5         | 187 | 173 | 159 |
|     |          | Trial 3  | 214 | 109 | 0         | 201 | 104 | 0        | 200 | 106 | 7         | 189 | 171 | 158 |
|     |          | Trial 4  | 211 | 106 | 0         | 203 | 108 | 1        | 201 | 100 | 5         | 190 | 170 | 158 |
|     |          | Trial 5  | 218 | 110 | 0         | 203 | 114 | 2        | 202 | 100 | 6         | 192 | 173 | 160 |

|          |          | D-11-Ag  |     |     |           |     |     | D-11-Hg  |     |     |           |     |     |     |
|----------|----------|----------|-----|-----|-----------|-----|-----|----------|-----|-----|-----------|-----|-----|-----|
|          |          | 0.0001 M |     |     | 0.00001 M |     |     | 0.0001 M |     |     | 0.00001 M |     |     |     |
|          |          | R        | G   | B   | R         | G   | B   | R        | G   | B   | R         | G   | B   |     |
| I-       | 0        | Trial 1  | 193 | 56  | 8         | 203 | 96  | 1        | 154 | 49  | 24        | 178 | 142 | 185 |
|          |          | Trial 2  | 196 | 57  | 7         | 205 | 96  | 1        | 150 | 42  | 22        | 179 | 145 | 190 |
|          |          | Trial 3  | 201 | 59  | 5         | 205 | 96  | 1        | 156 | 43  | 21        | 182 | 145 | 189 |
|          |          | Trial 4  | 203 | 59  | 7         | 204 | 96  | 1        | 160 | 41  | 23        | 185 | 143 | 190 |
|          |          | Trial 5  | 200 | 56  | 7         | 205 | 98  | 1        | 161 | 39  | 19        | 195 | 145 | 195 |
|          | 1.00E-05 | Trial 1  | 184 | 62  | 9         | 198 | 99  | 1        | 155 | 52  | 28        | 186 | 145 | 190 |
|          |          | Trial 2  | 187 | 60  | 8         | 199 | 99  | 1        | 155 | 49  | 26        | 188 | 143 | 192 |
|          |          | Trial 3  | 188 | 62  | 8         | 199 | 103 | 1        | 155 | 46  | 23        | 189 | 148 | 194 |
|          |          | Trial 4  | 185 | 62  | 8         | 203 | 98  | 1        | 159 | 47  | 27        | 188 | 146 | 192 |
|          |          | Trial 5  | 193 | 65  | 7         | 205 | 103 | 1        | 167 | 45  | 23        | 192 | 146 | 194 |
|          | 5.00E-05 | Trial 1  | 182 | 69  | 11        | 204 | 103 | 0        | 171 | 58  | 19        | 189 | 184 | 162 |
|          |          | Trial 2  | 179 | 68  | 9         | 205 | 103 | 0        | 169 | 57  | 18        | 192 | 180 | 151 |
|          |          | Trial 3  | 185 | 72  | 9         | 203 | 103 | 1        | 174 | 56  | 19        | 193 | 184 | 158 |
|          |          | Trial 4  | 182 | 66  | 9         | 203 | 105 | 0        | 174 | 62  | 21        | 195 | 185 | 158 |
|          |          | Trial 5  | 181 | 68  | 9         | 203 | 108 | 0        | 179 | 64  | 21        | 200 | 186 | 155 |
|          | 1.00E-04 | Trial 1  | 194 | 72  | 3         | 217 | 106 | 0        | 208 | 131 | 23        | 193 | 184 | 146 |
|          |          | Trial 2  | 190 | 67  | 2         | 211 | 104 | 1        | 203 | 129 | 23        | 195 | 185 | 152 |
|          |          | Trial 3  | 192 | 68  | 3         | 211 | 97  | 1        | 211 | 136 | 28        | 197 | 186 | 150 |
|          |          | Trial 4  | 188 | 72  | 2         | 209 | 101 | 0        | 207 | 135 | 30        | 199 | 186 | 152 |
|          |          | Trial 5  | 191 | 69  | 1         | 211 | 105 | 0        | 209 | 136 | 27        | 203 | 189 | 150 |
|          | 5.00E-04 | Trial 1  | 198 | 108 | 3         | 201 | 111 | 2        | 204 | 99  | 3         | 205 | 193 | 151 |
|          |          | Trial 2  | 201 | 107 | 2         | 204 | 107 | 0        | 205 | 99  | 2         | 203 | 192 | 150 |
|          |          | Trial 3  | 205 | 108 | 1         | 206 | 110 | 0        | 207 | 95  | 1         | 203 | 192 | 147 |
|          |          | Trial 4  | 205 | 107 | 1         | 208 | 111 | 1        | 211 | 99  | 0         | 206 | 195 | 156 |
|          |          | Trial 5  | 206 | 108 | 1         | 207 | 110 | 1        | 215 | 97  | 0         | 206 | 196 | 157 |
| 1.00E-03 | Trial 1  | 197      | 105 | 3   | 205       | 108 | 1   | 202      | 101 | 1   | 187       | 177 | 147 |     |
|          | Trial 2  | 198      | 101 | 2   | 200       | 102 | 1   | 202      | 102 | 1   | 187       | 177 | 145 |     |
|          | Trial 3  | 201      | 97  | 1   | 202       | 108 | 1   | 205      | 105 | 1   | 190       | 178 | 147 |     |
|          | Trial 4  | 200      | 100 | 1   | 206       | 108 | 1   | 207      | 103 | 1   | 195       | 179 | 146 |     |
|          | Trial 5  | 202      | 98  | 2   | 209       | 106 | 0   | 210      | 107 | 0   | 192       | 183 | 146 |     |
| 5.00E-03 | Trial 1  | 208      | 100 | 1   | 207       | 107 | 1   | 203      | 106 | 1   | 188       | 179 | 150 |     |
|          | Trial 2  | 209      | 100 | 1   | 203       | 110 | 1   | 205      | 107 | 0   | 187       | 179 | 149 |     |
|          | Trial 3  | 209      | 102 | 0   | 206       | 106 | 1   | 204      | 106 | 1   | 189       | 182 | 149 |     |
|          | Trial 4  | 209      | 103 | 1   | 208       | 107 | 1   | 204      | 108 | 0   | 192       | 183 | 148 |     |
|          | Trial 5  | 212      | 104 | 1   | 207       | 105 | 1   | 205      | 107 | 1   | 198       | 186 | 150 |     |
| 1.00E-02 | Trial 1  | 212      | 104 | 0   | 211       | 112 | 1   | 213      | 113 | 1   | 191       | 182 | 154 |     |
|          | Trial 2  | 207      | 107 | 1   | 214       | 111 | 1   | 208      | 111 | 0   | 193       | 180 | 153 |     |
|          | Trial 3  | 214      | 110 | 1   | 210       | 107 | 0   | 211      | 109 | 1   | 189       | 184 | 153 |     |
|          | Trial 4  | 210      | 109 | 1   | 210       | 105 | 1   | 213      | 110 | 0   | 190       | 179 | 155 |     |
|          | Trial 5  | 209      | 106 | 0   | 213       | 106 | 1   | 213      | 111 | 1   | 189       | 181 | 149 |     |
